# Supplementary material for: Prevalence and Determinants of Excessive Screen Viewing Time in Children Aged 3–15 Years and Its Effects on Physical Activity, Sleep, Eye Symptoms and Headache
Source: MDPI journal article supplement (doi:10.3390/ijerph20043449), 2023-02-16
Supplement: s1 [file s1]

**Questionnaire: Screen time**

|                   |                                                        |
|-------------------|--------------------------------------------------------|
| School Name _____ | Child enrolment number (Not be filled by parent) _____ |
|-------------------|--------------------------------------------------------|

Child name \_\_\_\_\_ Gender \_\_\_\_\_ Age \_\_\_\_\_ Class \_\_\_\_\_

**1. 1 Socio-Demographic Information:**

**1.1.1 Name of Mother :** \_\_\_\_\_

**1.1.2 Educational Criteria of Responder**

- 01: Uneducated
- 02: Elementary school
- 03: High school
- 04: High Sec
- 05: Graduate
- 06 Post Graduate

**1.1.3 Family information**

**1.1.3.1 Type of Family**

☐

- 01 Nuclear
- 02 Joint

**1.1.3.2 Number of family members .....**

**1.1.3.3 Number of sibling .....**

**1.1.3.4 Age of sibling 1<sup>st</sup>..... 2<sup>nd</sup>..... 3..... 4<sup>th</sup> .....**

**1.1.3.5 Overcrowding**

☐

- 01 Yes
- 02 No

CRITERIA – no. of family member for room

- 1 Room 2 person
- 2 Room 3 person
- 3 Room 5 person
- 4 Room 7 person
- 5 Or more rooms 10 person (Additional 2 for each room)

**1.1.3.6 Maternal information**

**1.1.3.6.1 Mother still living**

☐

- 01 Yes
- 02 No

**1.1.3.6.2 Mother age .....yrs**

**1.1.3.6.3 Mother's education**

- 01: Uneducated
- 02: Elementary school
- 03: High school
- 04: High Sec
- 05: Graduate
- 06 Post Graduate

**1.1.3.6.4 Mother's occupation**

- 01 Housewife
- 02 Self employed
- 03 Farm-worker
- 04 Labour
- 05 Official job

**1.1.3.7 Father's information.**

**1.1.3.7.1 Father still living**

- 01 Yes
- 02 No

**1.1.3.7.2 Father age .....yrs**

**1.1.3.7.3 Father's education**

- 01: Uneducated
- 02: Elementary school
- 03: High school
- 04: High Sec
- 05: Graduate
- 06: Post Graduate

**1.1.3.7.4 Father's occupation**

- 01 Unemployed
- 02 Self employed
- 03 Farm-worker
- 04 Labour
- 05 Official Job

**1.1.4 Socioeconomic status:**

**1.1.4.1 Place of residence**

- 01 Urban
- 02 Rural

## 2. Screen viewing related questionnaire

### 2.1 Parent screen view time

|                   |                                                                                                                     |                   |                           |              |                  |                   |                           |              |
|-------------------|---------------------------------------------------------------------------------------------------------------------|-------------------|---------------------------|--------------|------------------|-------------------|---------------------------|--------------|
|                   | Please inform for how many hours/day you use TV, mobiles, tablet and computer/laptops in below mentioned categories |                   |                           |              |                  |                   |                           |              |
|                   | During week days                                                                                                    |                   |                           |              | During week ends |                   |                           |              |
|                   | For education                                                                                                       | For entertainment | To keep yourself occupied | Others _____ | For education    | For entertainment | To keep yourself occupied | Others _____ |
| TV                |                                                                                                                     |                   |                           |              |                  |                   |                           |              |
| Mobile            |                                                                                                                     |                   |                           |              |                  |                   |                           |              |
| Computer / Laptop |                                                                                                                     |                   |                           |              |                  |                   |                           |              |

### 2.2 Child screen view time

|                   |                                                                                                                                 |                   |                          |              |                  |                   |                          |              |
|-------------------|---------------------------------------------------------------------------------------------------------------------------------|-------------------|--------------------------|--------------|------------------|-------------------|--------------------------|--------------|
|                   | Please inform for how many hours/day does your child use TV, mobiles, tablet and computer/laptops in below mentioned categories |                   |                          |              |                  |                   |                          |              |
|                   | During week days                                                                                                                |                   |                          |              | During week ends |                   |                          |              |
|                   | For education                                                                                                                   | For entertainment | To keep himself occupied | Others _____ | For education    | For entertainment | To keep himself occupied | Others _____ |
| TV                |                                                                                                                                 |                   |                          |              |                  |                   |                          |              |
| Mobile            |                                                                                                                                 |                   |                          |              |                  |                   |                          |              |
| Computer / Laptop |                                                                                                                                 |                   |                          |              |                  |                   |                          |              |

### 2.3 Do you place any restrictions on the amount of time your child can be in front of a screen (TV,mobile,tablet,computer/laptop)?

1. Yes              2. No

### 2.4 Do you place any restrictions on the content your child view on the screen(TV, mobile tablet,computer/laptop)? (movie ratings, YouTube video lyrics, parental settings, etc.)

1. Yes              2. No

### 2.5 Does your child interact with an electronic device soon after waking up?

- 1.Yes

a.as soon as he/she gets up    b.within .....hours after waking up

- 2.No

### 2.6 Do you have TV in your bedroom?

1. Yes            2. No

**2.7 Does your child use mobile phone at bed time?**

1. Yes            2. No

**2.8 Has your child ever complained of headache?**

1. Yes            2. No

**If yes: Do you think the headache can be because of using screen (any screen TV/Mobile/Tablet/Laptop/computer)**

1. Yes            2. No

**2.9 Has your child ever complained of eye pain?**

1. Yes            2. No

**If yes: Do you think the eye pain can be because of using screen (any screen TV/Mobile/ Tablet/Laptop/computer)**

1. Yes            2. No

**2.10 Has your child ever complained of itching in eyes?**

1. Yes            2. No

**If yes: Do you think the itching in eyes can be because of using screen (any screen TV/Mobile/ Tablet/Laptop/computer)**

1. Yes            2. No

**2.11 Do you think your child is habituated to screen (any screen TV/Mobile/ Tablet/Laptop/computer)**

1. Yes            2. No

**2.12 Does your child requires a screen (any screen TV/Mobile/ Tablet/Laptop/computer) for eating (lunch/breakfast/dinner)?**

1. Yes            2. No

**2.13 Does your child watch screen (any screen TV/Mobile/ Tablet/Laptop/computer) while eating (lunch/breakfast/dinner)?**

1. Yes : ☐ Breakfast    ☐ Lunch        ☐ Dinner

2. No

**2.14 Do you know what is the maximum recommended time for viewing screen?**

1. Yes            2. No

**2.15 Does your child plays outside home?**

1. Yes: How many minutes or hours/ day.....2.No

**2.16 Does your child reads any other book apart from school book (story book/news paper etc)?**

1.Yes: How much time- \_\_\_\_\_ minutes or hours/ day

2.No

**2.17 Do you/any other family member read/tell stories to the child**

1. Yes: How frequently - ☐ Everyday    ☐ Once a week    ☐ Once a month

2.No

**2.18 At what approximate time does your child goes to sleep at night every day?**

-----

**2.19 How many hours does your child sleep at night?**

\_\_\_\_\_ Hrs in night

**2.20 Do you think this survey was useful for your child?**

1. Yes                      2.No

**2.21 What will you do now after knowing all this information?**

\_\_\_\_\_  
\_\_\_\_\_

**I would like you to give information regarding screen time use-**

According to American Academy Of Pediatrics; For children 18 months to 5 years, the AAP now recommends aiming for one hour of screen entertainment per day, rather than two.

AAP's new policy statement for children ages 5 to 17 actually has no standard **screen-time limit**.

Eight to 10 hours of sleep, time for homework, family time, and time that is completely screen-free. Look at the time that's left and seems reasonable for media use.

## **Content Validity Ratio of SVT questionnaire**

| <b>Question no</b> | <b>Experts 1</b> | <b>Experts 2</b> | <b>Experts 3</b> | <b>CVR<br/>(NE – N/2) / (N/2)</b> |
|--------------------|------------------|------------------|------------------|-----------------------------------|
| 2.1                | √                | ×                | √                | 0.33                              |
| 2.2                | √                | √                | √                | 1                                 |
| 2.3                | √                | √                | √                | 1                                 |
| 2.4                | √                | √                | ×                | 0.33                              |
| 2.5                | √                | √                | √                | 1                                 |
| 2.6                | √                | √                | √                | 1                                 |
| 2.7                | √                | √                | √                | 1                                 |
| 2.8                | √                | √                | √                | 1                                 |
| 2.9                | √                | √                | √                | 1                                 |
| 2.10               | √                | √                | √                | 1                                 |
| 2.11               | √                | ×                | √                | 0.33                              |
| 2.12               | √                | √                | √                | 1                                 |
| 2.13               | √                | √                | √                | 1                                 |
| 2.14               | √                | √                | √                | 1                                 |
| 2.15               | √                | √                | √                | 1                                 |
| 2.16               | √                | √                | ×                | 0.33                              |
| 2.17               | √                | √                | √                | 1                                 |
| 2.18               | √                | √                | √                | 1                                 |
| 2.19               | √                | √                | √                | 1                                 |
| 2.20               | √                | √                | √                | 1                                 |
|                    |                  |                  |                  | <b>17.33</b>                      |

**Content Validity Ratio = (NE – N/2) / (N/2)**

- NE = Number of SME panelists indicating “essential”
- N = Total number of SME panelists

**CVR = (0.33+1+1+0.33+1+1+1+1+1+0.33+1+1+1+1+0.33+1+1+1+1)**

**Total CVR = 17.33**

**Content Validity Index = (CVR) / Total number of questions**

**CVI = (0.33+1+1+0.33+1+1+1+1+1+0.33+1+1+1+1+0.33+1+1+1+1) / 20**

**CVI = 0.867**
